# Supplementary material for: Mitigation of salt effect using graphene oxide as additives in plantation
Source: Royal Society of Chemistry journal article supplement (doi:10.1039/d3en00992k), 2024-01-01
Supplement: d3en00992k1.pdf [file d3en00992k1.pdf]

## Supporting Information

### Mitigation of salt effect using graphene oxide as additives in plantation

Mizuki Yamada,<sup>a</sup> || Nonoka Goto,<sup>b</sup> || Yuki Hachiya,<sup>a</sup> Tatsuki Tsugawa,<sup>b</sup> Lutfia Isna Ardhayanti,<sup>b</sup> Md. Saidul Islam,<sup>b,c</sup> Yoshihiro Sekine,<sup>b,d</sup> Shintaro Ida,<sup>c</sup> Shinichiro Sawa,<sup>a,c\*</sup> and Shinya Hayami<sup>a,b,c\*</sup>

a International Research Center for Agricultural and Environmental Biology (IRCAEB) 2-39-1 Kurokami, Chuo-ku, Kumamoto 860-8555, Japan.

b Department of Chemistry, Faculty of Advanced Science and Technology, Kumamoto University, 2-39-1 Kurokami, Kumamoto 860-8555, Japan.

c Institute of Industrial Nanomaterials, Kumamoto University, 2-39-1 Kurokami, Chuo-ku, Kumamoto 860-8555, Japan.

d Priority Organization for Innovation and Excellence, Kumamoto University, 2-39-1 Kurokami, Chuo-ku, Kumamoto 860-8555, Japan.

|| Author contribute equally

### Experimental procedure:

**Adsorption of NaCl using GO and cellulose:** We have investigated the adsorption capabilities of graphene oxide (GO) and cellulose for sodium chloride (NaCl). We prepared a 100 mM NaCl solution and measured its concentration before and after the adsorption process. For each experiment, 10 mL of the NaCl solution was mixed with 10 mL of either GO or cellulose suspension. The mixtures were stirred for 24 hours and then filtered. GO was used at three different concentrations (1, 10, and 100 mg/L), while cellulose was used at a concentration of 10 mg/L. To provide a basis for comparison, similar experiments were conducted with graphite under the same conditions. After filtration, the NaCl concentration in the solution was measured again to determine the amount adsorbed by the materials. Additionally, the filtered GO and cellulose samples were analyzed using X-ray photoelectron spectroscopy (XPS) to verify the presence of NaCl within the materials.

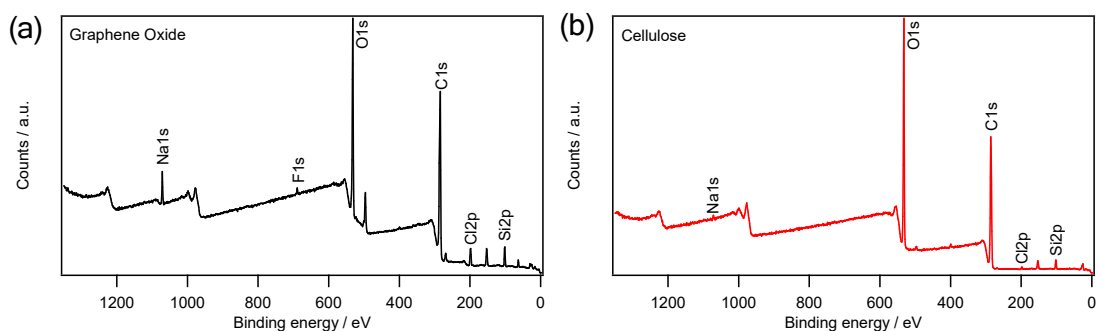

Figure S1: XPS survey spectra conducted after adsorption of NaCl using a) GO and b) cellulose

Table S1: Adsorption of NaCl using GO, graphite, and cellulose

| Sample name       | NaCl concentration           |                            |               | Percentage adsorption (%) |
|-------------------|------------------------------|----------------------------|---------------|---------------------------|
|                   | Initial concentration (mg/L) | final concentration (mg/L) | adsorb (mg/L) |                           |
| GO 1 mg/L         | 2200                         | 1960                       | 240           | 10.91                     |
| GO 10 mg/L        | 2200                         | 1960                       | 240           | 10.91                     |
| GO 100 mg/L       | 2200                         | 2020                       | 180           | 8.18                      |
| Graphite 10 mg/L  | 2200                         | 2120                       | 80            | 3.64                      |
| Cellulose 10 mg/L | 2200                         | 1920                       | 280           | 12.73                     |

Table S2: Percentage of elements obtained from XPS analysis conducted after adsorption of NaCl using GO and cellulose

| Sample         | Element |       |      |      |      |      |
|----------------|---------|-------|------|------|------|------|
|                | C       | O     | Na   | Cl   | Si   | F    |
| Graphene Oxide | 69%     | 23.3% | 1.2% | 1.5% | 4.8% | 0.2% |
| Cellulose      | 62.2%   | 34.2% | 0.3% | 0.1% | 3.2% |      |
